# Supplementary material for: Dual function of angiogenin-4 inducing intestinal stem cells and apoptosis
Source: Frontiers journal article supplement (doi:10.3389/fcell.2023.1181145), 2023-11-02
Supplement: Data_Sheet_1.PDF [file Data_Sheet_1.PDF]

## *Supplementary Material*

# Dual function of angiogenin-4 inducing intestinal stem cells and apoptosis

Hirohito Abo<sup>1\*</sup>, Mst. Farzana Sultana<sup>1,2</sup>, Hiroto Kawashima<sup>1\*</sup>

**\* Correspondence:**

Hirohito Abo, Ph.D.

[habo@chiba-u.jp](mailto:habo@chiba-u.jp)

Hiroto Kawashima, Ph.D.

[h-kawashima@chiba-u.jp](mailto:h-kawashima@chiba-u.jp)

## Supplementary Figures

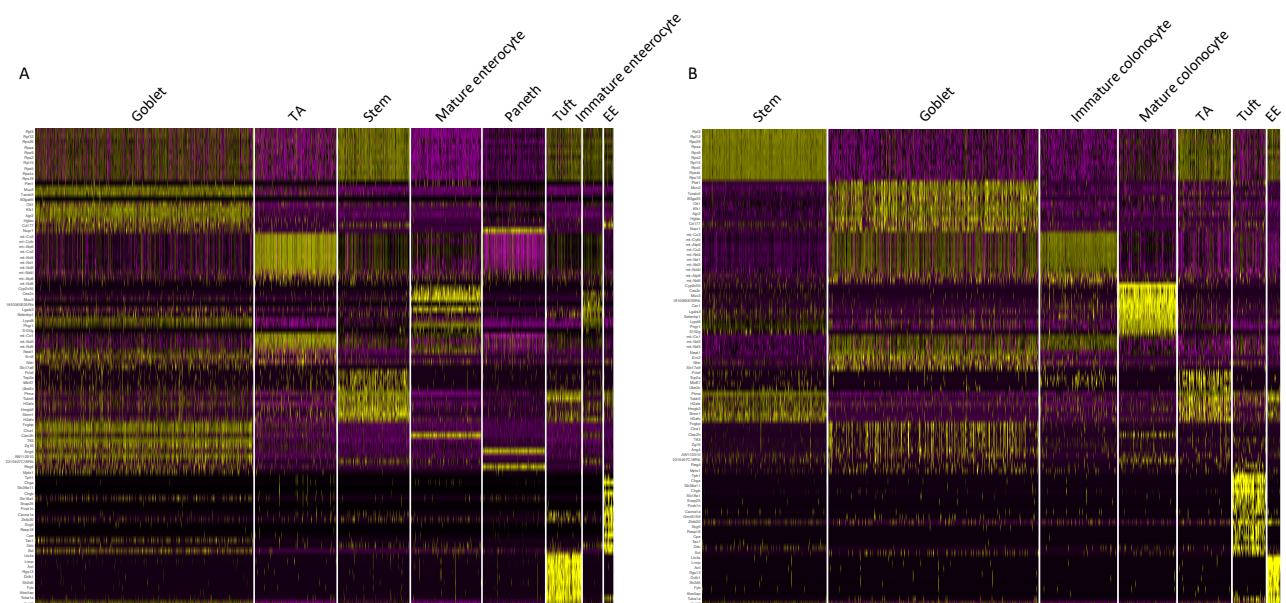

**Supplementary Figure 1. Heatmap of defined IEC subsets.**

**(A)** Heatmap of IEC subsets in small intestine. **(B)** Heatmap of IEC subsets in large intestine.

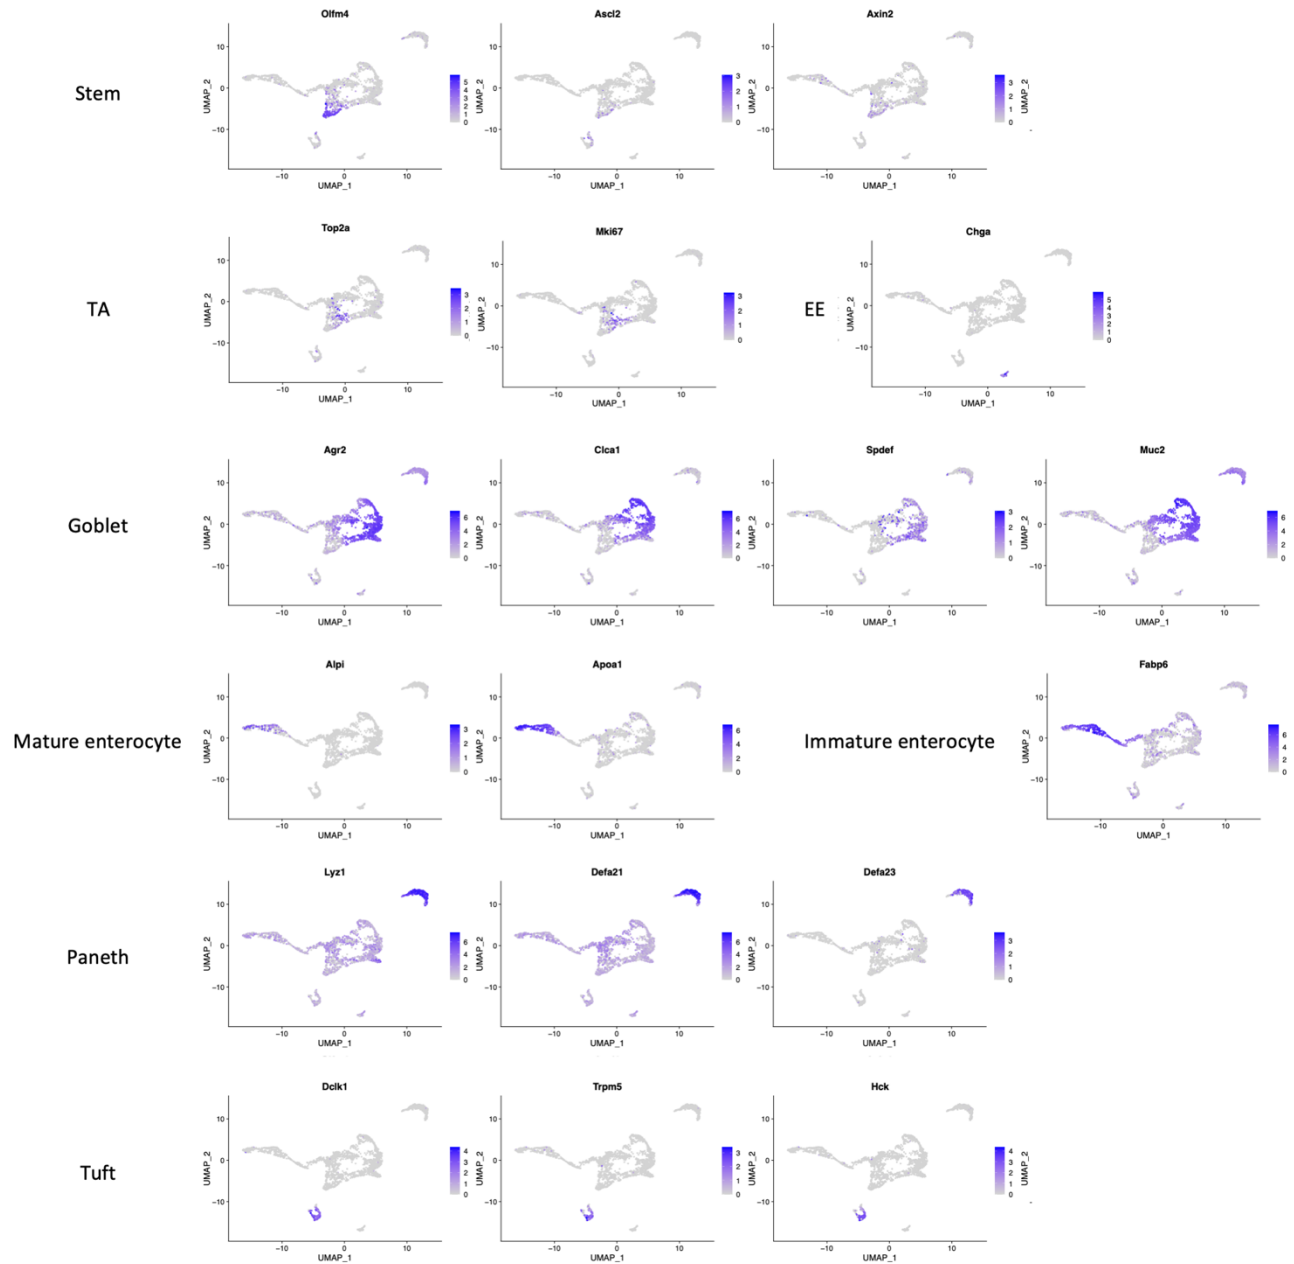

**Supplementary Figure 2. Feature plot of genes used for IEC subset identification in small intestine.**

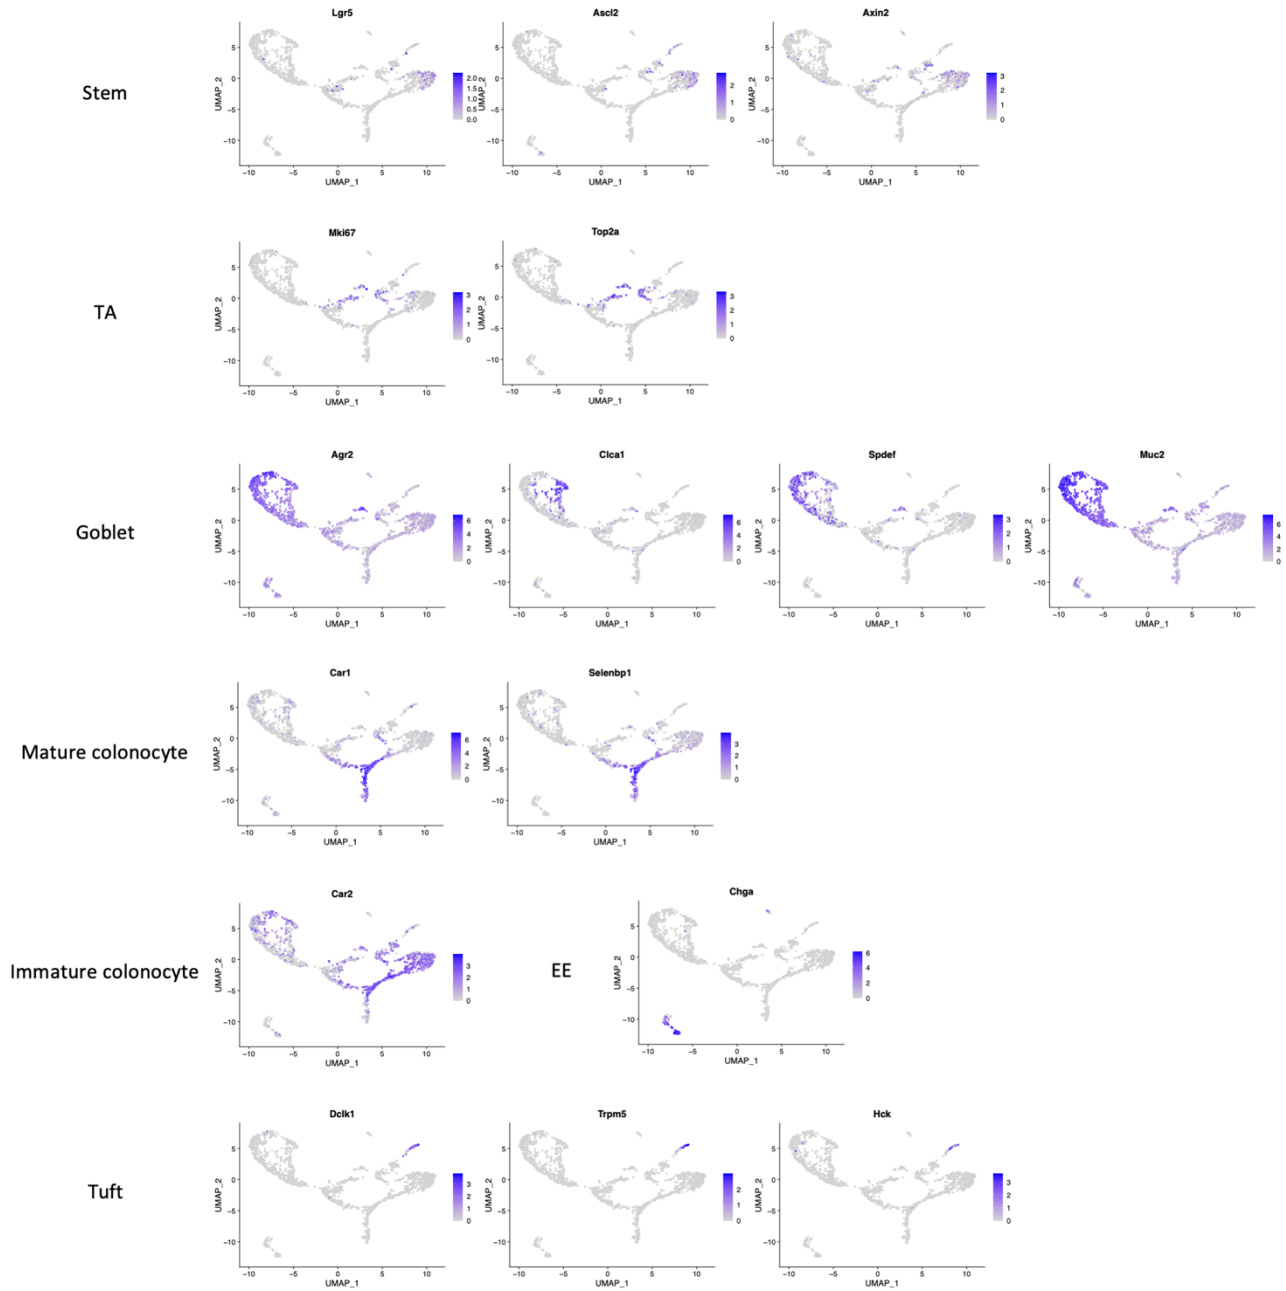

**Supplementary Figure 3. Feature plot of genes used for IEC subset identification in large intestine.**

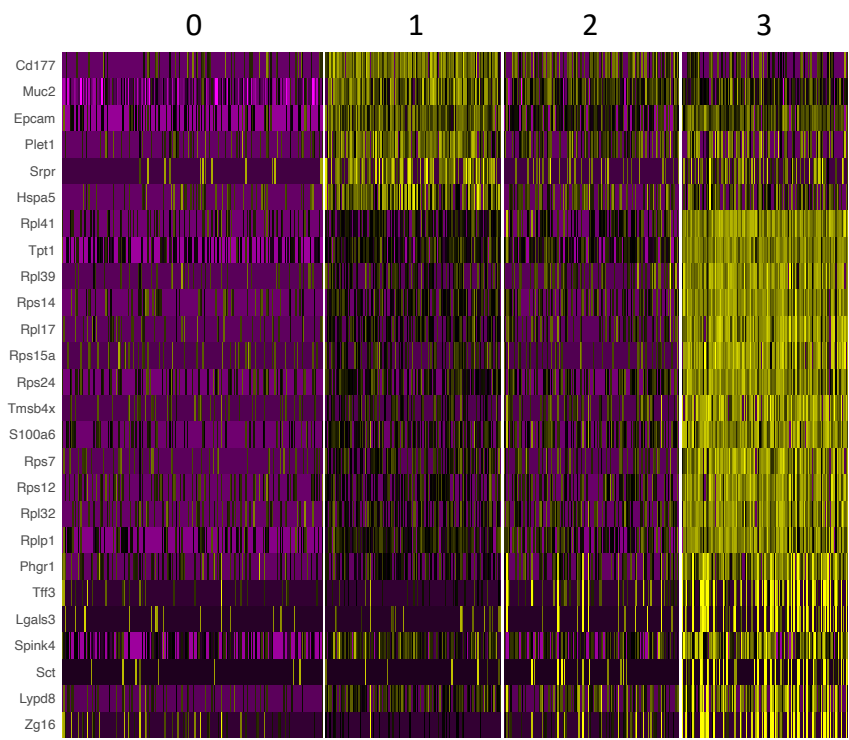

**Supplementary Figure 4. Heatmap of subpopulations divided in four clusters on goblet cells.**

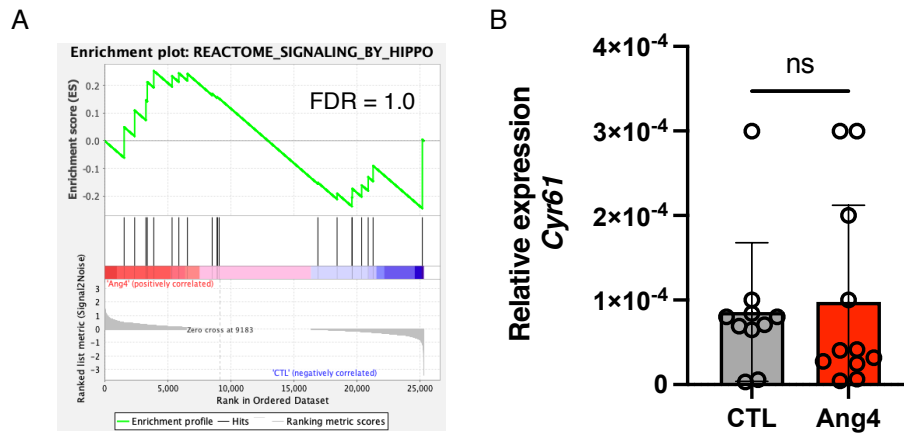

**Supplementary Figure 5. Ang4 doesn't affect Hippo-Yap/Taz pathway.**

**(A)** GSEA analysis using gene set of Hippo-Yap/Taz signaling. **(B)** qPCR analysis of *Cyr61* (n=10-11). Data are pooled from three independent experiments and are presented as the mean  $\pm$  SD; ns; not significant via non-parametric Mann-Whitney test. RNA sequencing was performed by 4 samples in each group.

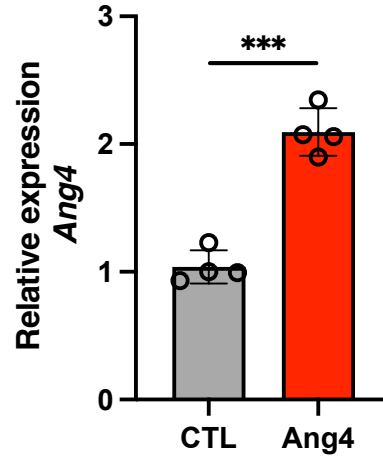

**Supplementary Figure 6. Ang4 increases its own expression.**

Expression of Ang4 on small intestinal organoid stimulated with Ang4 was analyzed by RNA sequencing. Data are presented as the mean  $\pm$  SD; \*\*\* $P < 0.001$  via non-parametric Mann-Whitney test. RNA sequencing was performed by 4 samples in each group.

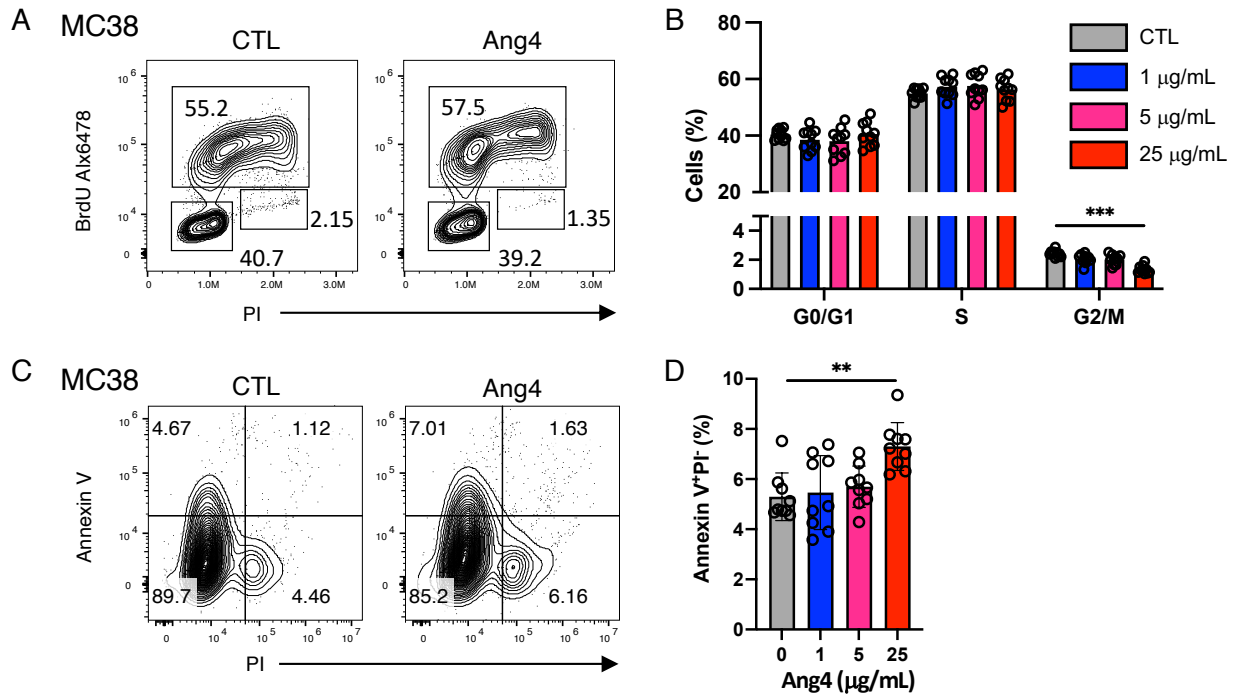

**Supplementary Figure 7. Ang4 suppresses cell proliferation via inducing apoptosis on MC38 cell.**

**(A)** Cell cycle analysis of the MC38 cell line cultured with or without Ang4 at a concentration of 25  $\mu\text{g/mL}$ . **(B)** Frequency of cell cycle at a concentration of 0, 1, 5, and 25  $\mu\text{g/mL}$  ( $n=9$ ). **(C)** Analysis of apoptosis on MC38 cells treated with or without Ang4 at a concentration of 25  $\mu\text{g/mL}$ . **(D)** Frequency of pre-apoptotic cells (Annexin V<sup>+</sup>PI) at a concentration of 0, 1, 5, and 25  $\mu\text{g/mL}$  ( $n=9$ ). Data are pooled from three independent experiments and are presented as the mean  $\pm$  SD; \*\* $P < 0.01$ , \*\*\* $P < 0.001$  via ANOVA followed by Tukey's multiple comparison test.

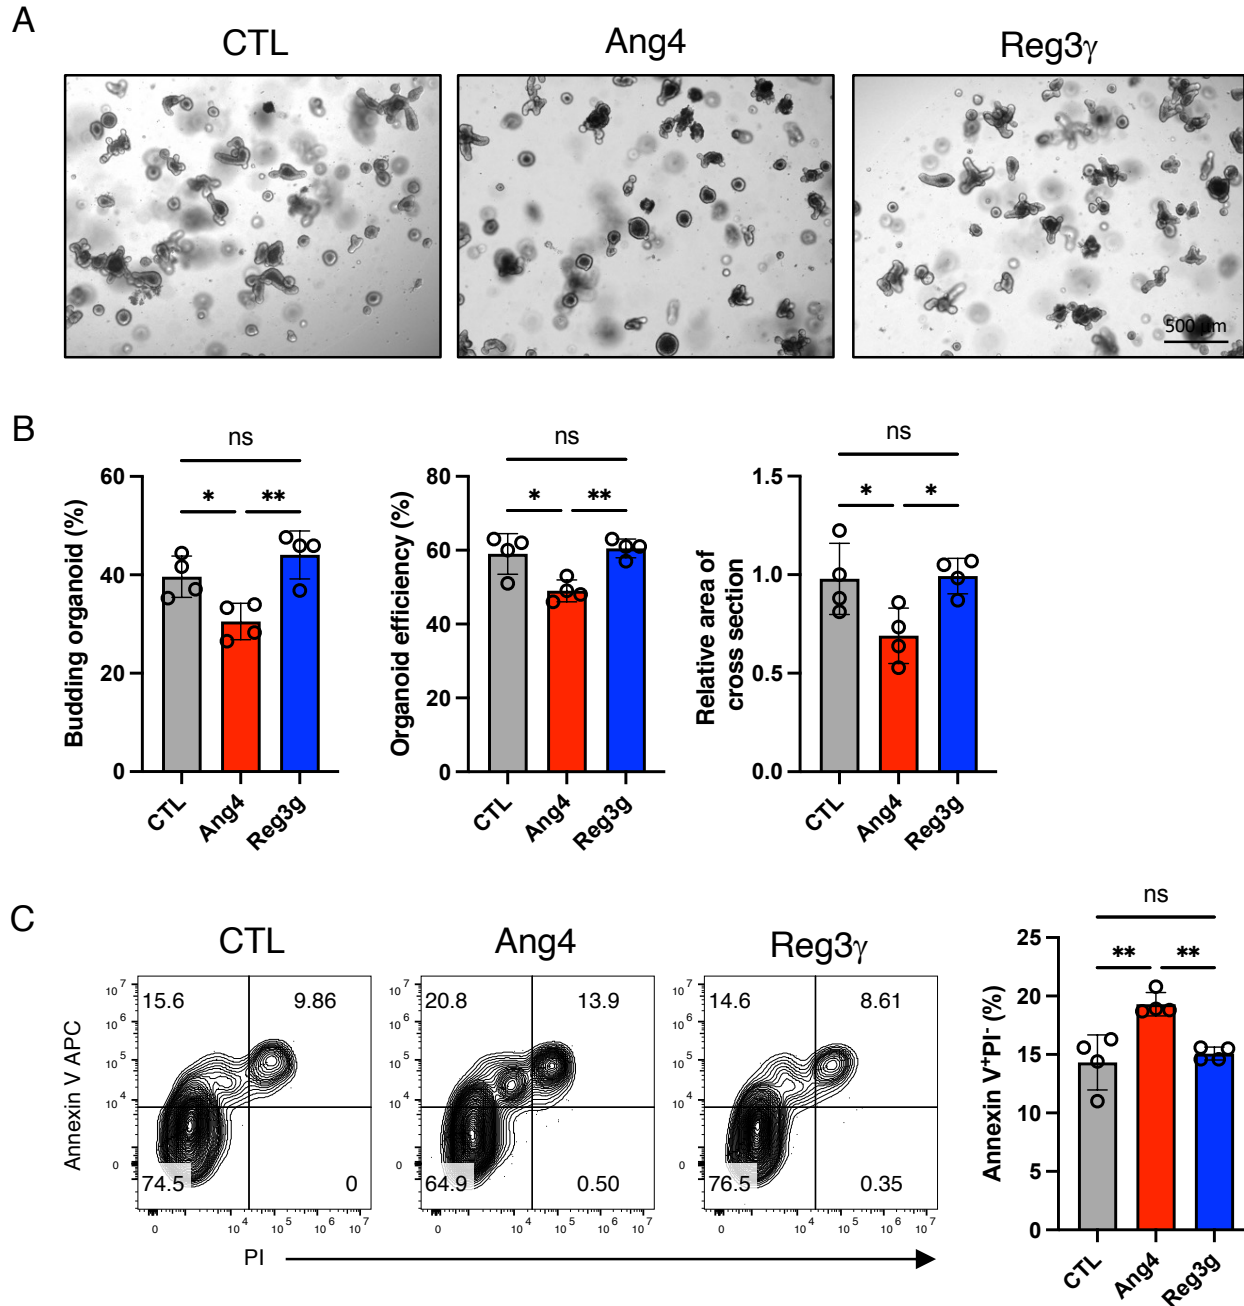

**Supplementary Figure 8. Analysis of apoptosis in organoids treated with Ang4 and Reg3 $\gamma$ .**

(A) Small intestinal organoids were treated with Ang4 and Reg3 $\gamma$  at concentration of 25  $\mu$ g/mL and 30  $\mu$ g/mL respectively. (B) Budding organoids, organoid efficiency, and area of cross section shown in (A) (n=4). (C) Analysis of apoptosis on organoids treated with Ang4 and Reg3 $\gamma$  (n=4). Data are presented as the mean  $\pm$  SD; \*\* $P$  < 0.01, \*\*\* $P$  < 0.001 via ANOVA followed by Tukey's multiple comparison test.



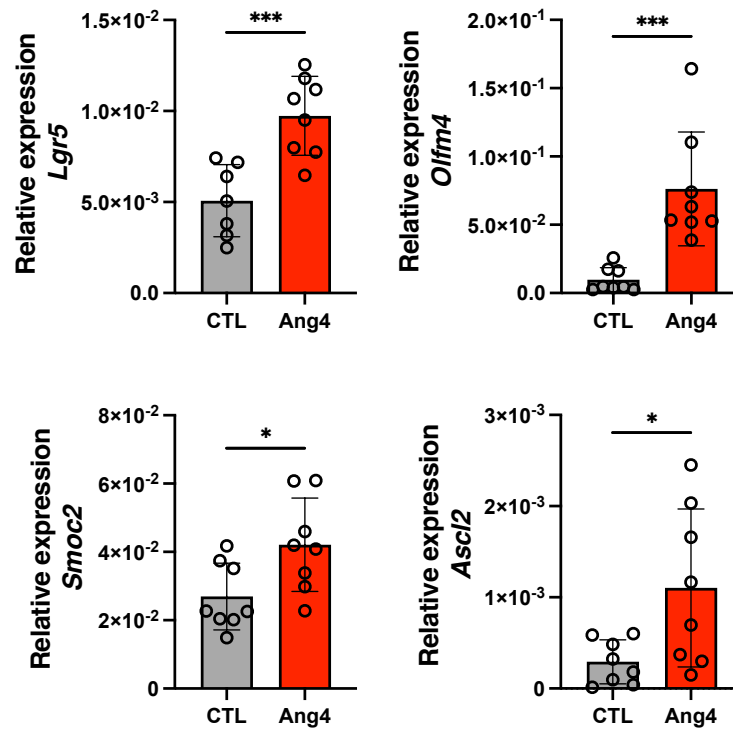

**Supplementary Figure 9. Ang4 enhances the expression of ISC signature genes at high concentrations.**

Expression of ISC signature genes in organoids cultured with Ang4 at a concentration of 25 µg/mL. Data are representative of two independent experiments and presented as the mean ± SD; \* $P < 0.05$ , \*\*\* $P < 0.001$  via non-parametric Mann-Whitney test.

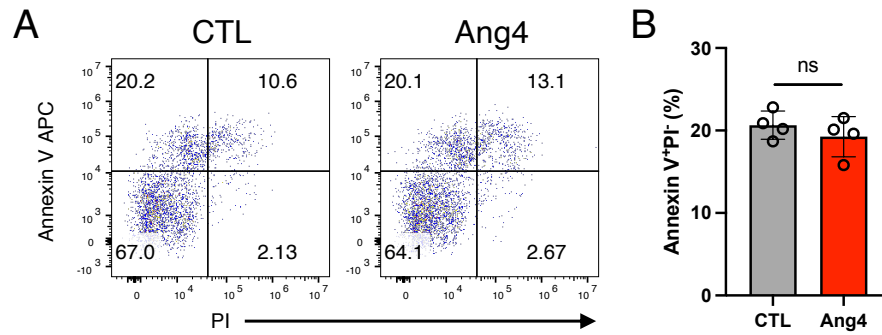

**Supplementary Figure 10. Low concentration of Ang4 has no effect on apoptosis.**

(A) Analysis of apoptosis on organoid cultured with Ang4 at 5  $\mu\text{g/mL}$ . (B) Frequency of pre-apoptotic cells (Annexin V<sup>+</sup>PI<sup>-</sup>) shown in (A). Data are representative of two independent experiments and are presented as the mean  $\pm$  SD; NS; not significant via non-parametric Mann-Whitney test.

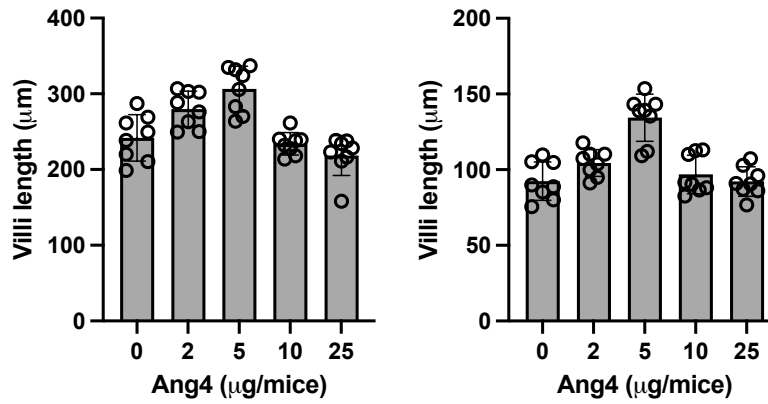

**Supplementary Figure 11. Concentration dependent effects of Ang4 on the length of villi and crypt.**

Villi and crypt length were measured in the mice treated with indicated amount of Ang4. Data are pooled from two independent experiments and presented as the mean  $\pm$  SD.

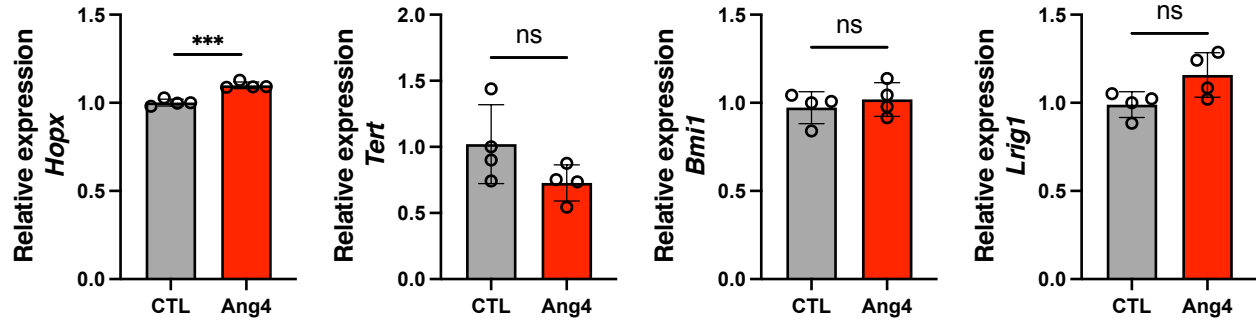

**Supplementary Figure 12. Ang4 doesn't affect +4 quiescent stem cell.**

Small intestinal organoids were stimulated with 5  $\mu\text{g/mL}$  Ang4 and expression of +4 quiescent stem cell marker genes analyzed by RNA sequencing. Data are presented as the mean  $\pm$  SD; ns; not significant, \*\*\* $P < 0.001$  via non-parametric Mann-Whitney test. RNA sequencing was performed by 4 samples in each group.
